1  
2 The telomere regulatory gene POT1 responds to stress and predicts performance in nature:  
3 implications for telomeres and life history evolution

4  
5 Running title: Telomere regulator POT1 predicts performance

6  
7 Sarah E. Wolf<sup>1,2\*</sup>, Tiana L. Sanders<sup>2</sup>, Sol E. Beltran<sup>2</sup>, and Kimberly A. Rosvall<sup>1,2</sup>

8  
9 <sup>1</sup>Department of Biology, Indiana University, Bloomington, IN

10 <sup>2</sup>Center for the Integrative Study of Animal Behavior, Indiana University, Bloomington, IN

11  
12 ORCID: SEW (0000-0002-2620-8999), KAR (0000-0003-3766-9624)

13  
14 \*Contact: wolfsae@indiana.edu

15

16 **ABSTRACT**

17  
18 Long telomeres have become nearly synonymous with a variety of fitness-related traits and may  
19 be mediators of ecologically relevant variation in life history strategies. Growing evidence  
20 suggests that telomere dynamics are more predictive of performance than length itself, but very  
21 little work considers how telomere regulatory mechanisms respond to environmental challenges  
22 or influence performance in nature. Here, we combine observational and experimental datasets  
23 from free-living tree swallows (*Tachycineta bicolor*) to assess how performance is predicted by  
24 the telomere regulatory gene POT1, which encodes a shelterin protein that sterically blocks  
25 telomerase from repairing the telomere. First, we show that lower POT1 gene expression was  
26 associated with higher female quality, i.e. earlier breeding, and heavier body mass. We next  
27 challenged mothers with an immune stressor (lipopolysaccharide injection) that led to ‘sickness’  
28 in mothers and 24h of food restriction in their offspring. While POT1 did not respond to maternal  
29 injection, females with lower constitutive gene expression were better able to maintain feeding  
30 rates following treatment. Maternal injection also generated a one-day stressor for chicks, who  
31 responded with decreased POT1 gene expression and elongated telomeres. Other putatively  
32 stress-responsive mechanisms (i.e. glucocorticoids, antioxidants) were not significantly different  
33 between control and stress-exposed chicks. Model comparisons indicated that POT1 mRNA  
34 abundance was a largely better predictor of performance than telomere dynamics, indicating  
35 that telomere regulators may be powerful modulators of variation in life history strategies.

36  
37 Keywords: protection of telomeres 1, corticosterone, bird, growth, recruitment

## 38 **1. INTRODUCTION**

39  
40 Ecology and evolutionary biology seek to understand causes and consequences of  
41 variation in life history strategies. In the last 30 years, biomedical research has revealed  
42 telomeres as strong predictors of health and longevity, and integration of these perspectives into  
43 eco-evolutionary biology points to telomeres as important mediators of life history trade-offs.  
44 Telomeres are ribonucleoprotein structures that buffer chromosomes from erosion during  
45 cellular replication (Zakian, 2012) but consequently shorten over time (Allsopp et al., 1995; De  
46 Lange, 2009), especially during periods of rapid growth (Geiger et al., 2012; Monaghan &  
47 Ozanne, 2018) and exposure to stressors (Chatelain et al., 2020). Telomere length may reflect  
48 somatic integrity, as short telomeres can induce cellular senescence (Blackburn, 2000; Hemann  
49 et al., 2001). Telomere shortening also may mirror damage to coding regions of DNA, to the  
50 degree that both experience simultaneous assault by oxidative damage (Kawanishi & Oikawa,  
51 2004; von Zglinicki, 2002). Consequently, telomeres are associated with survival among  
52 individuals (Frédéric Angelier et al., 2019; Eastwood et al., 2019; Wood & Young, 2019), a  
53 pattern shown across vertebrate species, albeit to varying degrees (Wilbourn et al., 2018). One  
54 resolution to these mixed results comes from data suggesting that an individual's *change* in  
55 telomere length better predicts survival than telomere length *itself* (Boonekamp et al., 2014;  
56 Wood & Young, 2019). These observations challenge the notion that telomeres are causally  
57 linked to performance and suggest a vital role for telomere regulatory mechanisms in shaping  
58 life history strategies.

59 At the heart of this issue lies a complex set of processes mediating telomere length.  
60 Glucocorticoids, which are linked with survival in many vertebrates (Schoenle et al., 2020), may  
61 induce telomere loss via increases in oxidative damage (Kawanishi & Oikawa, 2004; von  
62 Zglinicki, 2002) and downregulation of antioxidant defenses (Angelier et al., 2018; Costantini et  
63 al., 2011), which buffer telomeres from loss (Badas et al., 2015; Kim & Velando, 2015; Pineda-  
64 Pampliega et al., 2020). However, evidence that glucocorticoids increase oxidative damage is  
65 mixed (Lendvai et al., 2014; Vagasi et al., 2018; Vitousek et al., 2018). Glucocorticoids also may  
66 accelerate telomere loss (reviewed in Angelier et al., 2018), but evidence that this effect is  
67 mediated by oxidative stress is stronger *in vitro* than *in vivo* (Boonekamp et al., 2017; Reichert &  
68 Stier, 2017), and alternative mechanisms linking glucocorticoids and telomeres are emerging  
69 (e.g. mitochondrial metabolism; Casagrande et al., 2020). These data collectively warrant a  
70 renewed focus on processes that more directly control telomere length.

71 Telomerase – and the shelterin proteins that chaperone its effects – orchestrate changes  
72 to telomere length. Telomerase is an enzyme that elongates telomeres (Blackburn et al., 1989),  
73 and when upregulated, can have a positive effect on somatic health (reviewed in Criscuolo et  
74 al., 2018). High telomerase activity drives variation in growth (de Jesus et al., 2011, 2012) and  
75 mitochondrial function (Ahmed et al., 2008), but there are potential costs of high telomerase, if it  
76 prevents death of unhealthy cells (e.g. tumor growth, Granger et al., 2002; Greider, 1998).  
77 Telomerase activity is also stress-responsive (Beery et al., 2012; Choi et al., 2008; Zietzer et al.,  
78 2017), and shelterin proteins play an important regulatory role in telomerase activity (de Lange,  
79 2018). Among these is the TPP1-POT1 ('protection of telomeres 1') sub-complex, which  
80 *physically* interacts with telomerase at the 3' end, opening and closing the telomere to  
81 telomerase activity (Hwang et al., 2012; Wang et al., 2007). While TPP1 recruits telomerase to  
82 the telomere (de Lange, 2018), POT1 sterically blocks telomerase from access (Gu et al., 2017;  
83 Laprade et al., 2020). Dysregulation of POT1 is therefore common among cancers (reviewed in  
84 Wu et al., 2020), contributing to inappropriate cellular immortality. Although telomere elongation  
85 in the context of cancer is clearly maladaptive for the organism, comparable processes in  
86 healthy tissues may contribute to adaptation by positioning the telomere for repair.

87 Here, we test the hypothesis that telomere regulatory mechanisms respond to stress and  
88 predict performance in wild animals, evaluated with a focus on POT1. Specifically, we ask  
89 whether POT1 gene expression is associated with three markers of individual quality in  
90 breeding female tree swallows (*Tachycineta bicolor*), including first egg date, body mass, and  
91 wing length (Winkler et al., 2020). Next, we experimentally disrupted relationships between  
92 POT1 and performance by exposing breeding females to an ecologically relevant stressor  
93 (lipopolysaccharide injection), which leads to ‘sickness’ in mothers, and 24h of food restriction in  
94 their offspring. We assessed effects of this stressor on both mothers and offspring, including  
95 their ability to recover from stress. We measured chick growth and key aspects of telomere  
96 biology in chicks (i.e. change in relative telomere length, POT1 gene expression), as well as  
97 other traits that have been linked to telomere dynamics in previous work (i.e. glucocorticoids,  
98 antioxidants). Because decreases in POT1 should poise the telomere for repair, we predicted  
99 that lower POT1 gene expression would be associated with better performance. As we  
100 elaborate below, our results introduce POT1 as an ecologically important gene at the  
101 intersection of telomere and eco-evolutionary biology.  
102

## 103 **2. METHODS**

### 104 **2.1 Study System**

105 This study was approved by Indiana University IACUC #15-004 and all relevant local,  
106 state, and federal regulations. We conducted this experiment in spring 2017 in a nest box  
107 population we monitor annually in Monroe County, Indiana, USA (39.1851° N, 86.4997° W).  
108 This population contains ~270 nest boxes within 15km of one another, including 105 tree  
109 swallow nests in 2017 (average brood size =  $4.4 \pm 0.1$ ). Chicks disperse among these boxes  
110 annually, indicating they represent a connected population. We checked boxes regularly to  
111 determine lay dates, clutch size, and hatch dates.

112 We captured adults by hand or nest box trap (Stutchbury & Robertson, 1986) and  
113 banded them with a numbered USGS aluminum band on one leg and a colored passive  
114 integrated transponder (PIT) tag on the other. Most females were banded during incubation,  
115 including 41 of 43 used in this study; n=2 were banded upon treatment. Males were  
116 opportunistically banded throughout the breeding season, including 18 of 43 males paired with  
117 our focal females. We also recorded data on mass and wing length. Adult sex was confirmed via  
118 brood patch or cloacal protuberance.  
119

### 120 **2.2 Experimental Injection of Chick-Rearing Females**

121 We began our experiment on day  $5.2 \pm 0.1$  of the nestling period (hatch day = day 1,  
122 range = 3-7 days). We captured females while they provisioned, either by blocking the entrance  
123 hole while the female was inside or by setting a nest box trap. We weighed each female and  
124 collected  $\leq 50\mu\text{L}$  blood for RNA. Following Palacios et al. (2011), we administered a  
125 subcutaneous injection of either saline or lipopolysaccharide (LPS) saline-oil emulsion in the  
126 right dorsal apterium (saline: n=22, LPS: n=21; see **SI materials**). LPS is a non-replicating  
127 piece of bacterial cell wall commonly used to temporarily trigger an immune response and  
128 induce ‘sickness’ behaviors, e.g. lethargy, weight loss, reduced parental care (Dantzer et al.,  
129 2008; Palacios et al., 2011). We recaptured 37 of the 43 females 24-48h later (n=29 within 24h,  
130 saline: n=16, LPS: n=13), at which time we weighed them and collected another  $\leq 50\mu\text{L}$  blood for  
131 RNA. Percent body mass change in the 24h following treatment was calculated relative to  
132 starting mass:  $((\text{mass}_{\text{post}} - \text{mass}_{\text{pre}})/\text{mass}_{\text{pre}}) \times 100$ . We could not recapture 6 females,  
133 including 2 who abandoned this breeding attempt.  
134

### 135 **2.3 Visitation Rates**

136 Past work shows that parental visitation rate is a reliable proxy of provisioning (McCarty,  
137 2002), and we used radio-frequency identification (RFID) boards to measure visitation rate. All  
138 nest boxes in the study were equipped with RFID readers, which recorded a unique tag ID and  
139 time stamp every time a PIT tag passed through the antennae at the box entrance (Bonter &  
140 Bridge, 2011; Lendvai et al., 2011). We determined the number of visits by filtering out  
141 continuous reads occurring within 3 sec of another read of the same individual, often generated  
142 when a bird is perched at the nest entrance. To account for entrances and exits, we halved the  
143 number of remaining reads. Previous work suggests that LPS-induced sickness can last 48h,  
144 but peak effects occur around 3-6h post-injection (Dantzer et al., 2008). Therefore, we  
145 quantified visitation rate as the average hourly number of visits occurring 3-6h post-injection.  
146 Baseline visitation rates were taken the day prior during the same 3h window (n=35; n=8  
147 excluded due to equipment failure). We also used 30-min behavioral observations to confirm  
148 that RFID and observed visitation rates were correlated ( $F_{1,53}=6.14$ ,  $p=0.0168$ ,  $n=55$ ,  $r=0.903$ ;  
149 see **SI materials**).

150

## 151 **2.4 Measuring Phenotypic Effects on Chicks**

152 We assessed how maternal treatment affected chicks in the subsequent week and  
153 limited our analyses to those nests treated during peak chick growth, which occurs at 5 to 6-  
154 days old (Wolf et al., in press). We therefore excluded 3 nests with 4 or 7-day old chicks and 3  
155 additional failed nests, which left a total of 37 nests (saline: n=20, LPS: n=17). While mothers  
156 were being injected, we measured nestling mass to the nearest 0.1g using an electronic scale,  
157 collected a chick blood sample from the metatarsal vein (30-50 $\mu$ L), and gave each chick a  
158 unique nail trimming for later identification (n=167 total chicks). The following day, we reweighed  
159 all chicks to calculate percent body mass change in the 24h following maternal treatment:  
160  $((\text{mass}_{\text{post}} - \text{mass}_{\text{pre}}) / \text{mass}_{\text{pre}}) \times 100$ .

161 We visited nestlings a third time when they were 12-days old. At this age, chicks are  
162 approaching asymptotic adult-like mass (Wolf et al., in press), they exhibit adult-like  
163 corticosterone secretion (Wada et al., 2007), and they are not likely to prematurely fledge.  
164 During sample collection, we left one chick in the nest to minimize disturbance to parents. For  
165 remaining chicks, we sought to collect blood from the alar vein within 3 min of disturbance  
166 (latency: 2:08  $\pm$  0:44 min) to measure baseline circulating corticosterone (hereafter CORT), and  
167 again at 30 min (31:14  $\pm$  1:00 min) to measure handling-induced elevated CORT. For the subset  
168 of nests whose mothers were treated when chicks were 5-days old, we opportunistically  
169 collected an additional blood sample within 5 min of disturbance (1:24  $\pm$  1:12 min) for gene  
170 expression analyses (Herdegen & Leah, 1998). Due to logistical constraints, we did not obtain  
171 each blood sample from every chick, as elaborated below. In total, we collected  $\leq 200\mu$ L blood  
172 from each chick, below the maximum suggested volume (Gaunt et al., 1997), based on an  
173 average 12-day old body mass of 19.9 $\pm$ 0.2g. We banded all chicks with one numbered USGS  
174 band. Blood was stored on ice (for hormones and DNA) or dry ice (for RNA). Later the same  
175 day, we centrifuged hormone samples, reserved plasma, and stored at -20°C. Whole blood and  
176 red blood cells were stored at -80°C.

177 At ~21 days post-hatch, we inspected all nests for signs of fledging (e.g., flattened nest,  
178 feces accumulation) or failure (e.g., remains, disturbed nest). We identified any remaining  
179 (dead) chicks based on leg bands, and assumed other chicks successfully fledged if the nest  
180 showed no signs of failure, following best practices in avian field biology (Martin & Geupel,  
181 1993; McCarty, 2001). During the following two breeding seasons (2018-2019), we captured  
182 breeding birds to estimate recruitment of chicks into the breeding population, as has been done  
183 in previous work in tree swallows (Lombardo et al., 2020; Shutler et al., 2006). We devoted  
184 substantial monitoring effort from March to July each year to locate and capture returning  
185 chicks, which can be easily distinguished by their single aluminum band.

186

## 187 **2.5 Quantifying Plasma Corticosterone**

188 We quantified plasma CORT using an enzyme immunoassay kit (Cayman #501320;  
189 assay sensitivity = 30 pg/mL), which we previously validated in tree swallows (Virgin & Rosvall,  
190 2018). We used 107 chicks from 34 nests (saline: n=20, LPS: n=14) for which we obtained  
191 sufficient plasma (>10 $\mu$ L) for both baseline and 30 min sampling points. We combined each  
192 10 $\mu$ L plasma with 200 $\mu$ L dH<sub>2</sub>O, vortexed, and performed 3 rounds of ether extractions. We dried  
193 extracts with N<sub>2</sub> and reconstituted with 600 $\mu$ L assay buffer. While we did not correct for  
194 extraction efficiency, recoveries are likely high because our extraction protocols have previously  
195 shown >90% efficiencies (George & Rosvall, 2018). Each plate included the following in  
196 duplicate: 8-point standard curve, blank, maximum binding, non-specific binding, total activity, 3  
197 plasma pools (for intra- and inter-plate variation), and 33 samples. We ran samples across 10  
198 plates, balanced by date, treatment, mass, and brood size. We read absorbance at 412nm  
199 using an Epoch spectrophotometer (BioTek, Winooski, VT, USA) and interpolated CORT levels  
200 using Gen5 software (v.2.09.2, BioTek). Inter-plate coefficient of variation (CV) was a 12.9%  
201 and intra-plate CV was 5.1  $\pm$  1.8%.

202

## 203 **2.6 Quantifying Gene Expression**

204 Our primary goal was to measure gene expression of POT1. We also generated a  
205 molecular measurement of antioxidant capacity (as in Sridhar et al., 2014; Yarru et al., 2009) –  
206 instead of measuring total antioxidant capacity in plasma using the OXY-ADSORBENT test (as  
207 in Beaulieu et al., 2011) – because plasma was depleted in CORT analyses. Specifically, we  
208 quantified the gene expression of glutathione peroxidase (GPX), peroxiredoxin-1 (PRDX-1), and  
209 superoxide dismutase (SOD). The products of these genes influence multiple measures of  
210 antioxidant function (Pisoschi & Pop, 2015), suggesting they are likely to be a generalized  
211 measure of antioxidant capacity. Gene expression values for all three antioxidants were  
212 positively correlated ( $R^2 > 0.62$ ), so we used a principal components analysis to condense these  
213 data. PC1 (Eigenvalue = 1.58) negatively loaded for all three antioxidants (SOD: -0.56, GPX: -  
214 0.61, PRDX1: -0.57) and accounted for 83% of the total variance. PC1 was multiplied by -1 so  
215 that positive values indicate higher gene expression. All gene expression data was log<sub>2</sub>-  
216 transformed for analyses.

217 We extracted RNA from whole blood using a phenol-chloroform-based Trizol method  
218 (Invitrogen, Carlsbad, CA) using PhaseLock tubes (5PRIME, #2302830). We synthesized cDNA  
219 using 1 $\mu$ g RNA and Superscript III reverse transcriptase (Invitrogen), treated with DNAase  
220 (Promega, Madison, WI) and RNase inhibitor (RNAsin N2111, Promega). cDNA was stored at -  
221 20°C. For each gene of interest, we used the 2<sup>- $\Delta\Delta$ Ct</sup> method of quantitative PCR, in which  
222 expression is normalized against a reference gene and relative to a calibrator sample run on  
223 each plate. We used PPIA (peptidylprolyl isomerase A) as a reference gene, as it is highly  
224 expressed in blood and reliable in birds (Zinzow-Kramer et al., 2014). All primer sequences  
225 were developed from the tree swallow transcriptome (accession #GSE126210; Bentz et al.,  
226 2019), and further details are reported in **Table S1**. Samples were run alongside no template  
227 controls, using PerfeCta SYBR Green FastMix with low ROX (Quanta Biosciences,  
228 Gaithersburg MD) on 384-well plates using an ABI Quantstudio 5 machine (Thermo Fisher  
229 Scientific, Foster City, CA) with Quantstudio Design & Analysis software (v1.4.3, Thermo Fisher  
230 Scientific). Each well included 3 $\mu$ L of cDNA diluted 1:50 (or 3 $\mu$ L water, for NTCs) and primers  
231 diluted to 0.3 $\mu$ M in a total volume of 10 $\mu$ L. All reactions use the following thermal profile: 10 min  
232 at 95°, followed by 40 cycles of 30 s at 95°, 1 min at 60°, and 30 s at 70°, with a final  
233 dissociation phase (1 min at 95°, 30 s at 55°, and 30 s at 95°) that confirmed single-product  
234 specificity for all samples. All samples fell within the bounds of the standard curve and the  
235 reaction efficiencies were always within 100  $\pm$  15%. A pool reference sample present on all  
236 plates was used to calculate intra- and inter-plate variation. Samples were run in triplicate, and  
237 the mean values were used to calculate the relative quantity for each sample using the following  
238 formula: 2<sup>- $\Delta\Delta$ Ct</sup>, where  $\Delta\Delta$ Ct = (Ct<sup>GOI</sup> - Ct<sup>PPIA</sup>)<sub>reference</sub> - (Ct<sup>GOI</sup> - Ct<sup>PPIA</sup>)<sub>sample</sub>. Mean intra and  
239 inter-plate variation of the C<sub>t</sub> values were 0.359% and 1.18% for PPIA, 0.156% and 0.397% for

240 SOD, 0.315% and 0.636% for PRDX-1, 0.681% and 0.437% for GPX, and 0.558% and 2.34%  
241 for POT1. In total, we quantified gene expression for  $n = 77$  nestlings (saline:  $n=48$ , LPS:  $n=29$ ),  
242 taken from 26 nests (saline:  $n=15$ , LPS:  $n=11$ ).  
243

## 244 2.7 DNA Extraction and Molecular sexing of chicks

245 We used the automated Maxwell® RSC Instrument (Promega, Madison, WI) and Whole  
246 Blood DNA Kit (#AS1520) to extract DNA from  $\leq 25\mu\text{L}$  red blood cells. We determined the sex of  
247 all chicks following established methods (Çakmak et al., 2017). Males exhibited a single band at  
248  $\sim 250\text{bp}$  and females exhibited a double band at  $\sim 250$  and  $275\text{bp}$  (see **SI Material**).  
249

## 250 2.8 Telomere Measurement

251 We quantified relative telomere length using qPCR, adapted from (Cawthon, 2009;  
252 Criscuolo et al., 2009). Relative telomere length was measured as the ratio (T/S) of telomere  
253 repeat copy number (T) to a single gene copy number (S), relative to a pooled reference sample  
254 present on all plates. We amplified our single copy gene, glyceraldehyde-3-phosphate  
255 dehydrogenase (GAPDH) and telomeres using primers telg/telc (see **Table S1**). We conducted  
256 qPCR on 384-well plates (ABI Quantstudio 5, Foster City, CA). For each sample, we ran  
257 GAPDH and telomere reactions on the same plate. Prior to plating, we diluted DNA samples to  
258  $3.33\text{ng}/\mu\text{L}$  using ultra-pure water. Each reaction had a total volume of  $10\mu\text{L}$  containing  $5\mu\text{L}$   
259 PerfeCTA SYBR Green SuperMix Low ROX (Quanta Biosciences, Gaithersburg, MD, USA),  
260  $200\text{nM}$  each GAPDH-F/GAPDH-R or  $200\text{nM}$  each telc/telg, and  $3\mu\text{L}$  DNA extract ( $10\text{ng}$  total).  
261 qPCR reaction conditions were: 10 min at  $95^\circ\text{C}$ , followed by 30 cycles of 10 s at  $95^\circ\text{C}$ , 1 min at  
262  $62^\circ\text{C}$ , and 30 s at  $72^\circ\text{C}$ , followed by 1 min at  $95^\circ\text{C}$ , 30 s at  $55^\circ\text{C}$ , and 30 s at  $95^\circ\text{C}$ . In both  
263 reactions, the number of PCR cycles necessary to accumulate sufficient fluorescent signal to  
264 cross a threshold ( $C_t$ ) was measured and individuals with relatively longer telomeres were  
265 characterized by shorter reaction times. All samples fell within the bounds of the standard curve  
266 and the reaction efficiencies were always within  $100 \pm 15\%$  (GAPDH:  $98.7 \pm 2.8$ ; telomeres:  
267  $107.6 \pm 8.2$ ). A tree swallow pool reference sample present on all plates was used to calculate  
268 intra- and inter-plate variation. Samples were run in triplicate, and mean values were used to  
269 calculate T/S ratios for each sample using the formula:  $2^{-\Delta\Delta C_t}$ , where  $\Delta\Delta C_t = (C_t^{\text{telomere}} - C_t^{\text{GAPDH}})_{\text{reference}}$   
270  $- (C_t^{\text{telomere}} - C_t^{\text{GAPDH}})_{\text{reference}}$ . From the original 167 chicks in the study, 161 survived to  
271 12-days old. From those 161 chicks, 147 have telomere measurements from both pre-treatment  
272 and 12-days old (saline:  $n=87$ , LPS:  $n=60$ ). From the 14 missing chicks, 9 were from 2 LPS  
273 nests inadvertently sampled at 11 or 13-days old, and 5 chicks had poor replicates for one or  
274 both samples and were excluded. Telomere attrition was corrected for regression to the mean  
275 (Verhulst et al., 2013), where more negative values indicate greater telomere loss.

276 Intraplate and interplate repeatabilities were calculated using the R package 'rptr' (Stoffel  
277 et al., 2017). Intraplate repeatability (estimated via intraclass correlation coefficient) was  $0.96 \pm$   
278  $0.004$  (95% CI = 0.95, 0.97) for GAPDH  $C_t$  values,  $0.88 \pm 0.011$  (95% CI = 0.86, 0.90) for  
279 telomere  $C_t$  values, and  $0.76$  (95% CI: 0.72, 0.80) for  $2^{-\Delta\Delta C_t}$  measurements. Interplate  
280 repeatability of  $2^{-\Delta\Delta C_t}$  for reference samples was  $0.84 \pm 0.13$  (95% CI = 0.46, 0.94). Because pre-  
281 and post-treatment pairs of samples were run on the same plate for each individual, and  
282 treatment was balanced across plates, plate effects on  $2^{-\Delta\Delta C_t}$  values should be minimal;  
283 however, we accounted for plate ID in telomere analyses to control for potential plate effects.

284 Next, we conducted a sensitivity analysis to assess the degree of measurement error in  
285 our telomere variable. We tested whether the random effect estimate of individual ID explained  
286 more variance in relative telomere length among technical replicates, i.e. triplicates next to each  
287 other on a plate, than variance between biological replicates, i.e. from pre-treatment to 12-days  
288 old (similar to van Lieshout et al., 2019, see SI XXX for details). After accounting for plate  
289 effects using MCMCglmm (Hadfield, 2010), the random effect estimate for individual ID  
290 explained more variance in relative telomere length among technical replicates ( $0.077$ ; 95% CI  
291 =  $0.057$ ,  $0.098$ ) than among biological replicates ( $0.0044$ ; 95% CI =  $0.0001$ ,  $0.01$ ), meaning that

292 noise in telomere measurements between technical replicates was much lower than biologically-  
293 relevant changes occurring within an individual during the study. We also parsed the data based  
294 on whether an individual's telomere length change was positive or negative to separately  
295 analyze technical and biological variance within these groups. None of these analyses show  
296 overlap of 95% CI for random effect estimates between technical and biological replicates  
297 (**Figure S1**), indicating that our measure is highly precise.

298

## 299 **2.9 Statistical Analyses**

300 All statistical analyses were performed in R (version 3.5.3, R Core Team, 2019). We  
301 used an information-theoretic approach to evaluate support for competing candidate models  
302 predicting each variable of interest. For each dependent variable, we used *dredge* (Barton,  
303 2019) to create model sets from the global model (detailed below), in which all models for a  
304 given response variable included the same subset of data. For global models, we assessed  
305 multicollinearity and removed redundant variables with variable inflation factors  $\geq 5$  (Fox &  
306 Weisberg, 2011). We used Akaike Information Criterion ( $AIC_c$  – to correct for sample size) for  
307 model comparisons (Burnham & Anderson, 2002), and we present  $\Delta AIC$  ( $AIC_i - AIC_{best\ model}$ ) and  
308 AIC weights (weight of evidence for model) for highly supported models with  $\Delta AIC \leq 2$   
309 compared to the top model (K. P. Burnham et al., 2011). All models with  $\Delta AIC \leq 2$  are equally fit,  
310 so when this occurred, we report the most parsimonious model (K. Burnham & Anderson,  
311 2002). To estimate how well models fit our data, we calculated pseudo- $R^2$  using the MuMIn  
312 package (Barton, 2019), which considers variance explained by either fixed ( $R^2_{marginal}$ ) or both  
313 fixed and random effects ( $R^2_{conditional}$ ). Variable significance of top or most parsimonious models  
314 was assessed using restricted maximum likelihood. We visually inspected model residuals for  
315 normality and homoscedasticity.

316 To ask whether POT1 gene expression or relative telomere length in the blood has more  
317 overall support in predicting traits of interest, we directly compared models including POT1 gene  
318 expression vs. relative telomere length. If multiple models were supported for each trait, we  
319 calculated variable importance of each predictor variable, or the sum of  $AIC_c$  weights for models  
320 containing that variable, where predictor variables with a value of 1 indicate greatest  
321 importance.

322

### 323 **2.9.1 Does POT1 or relative telomere length better predict female quality?**

324 We tested the hypothesis that POT1 gene expression and relative telomere length  
325 predict metrics of quality in breeding females, including first egg date, body mass, and wing  
326 length. For each trait, we ran a series of models which assumed a gaussian distribution and  
327 contained all combinations of POT1 gene expression, relative telomere length, first egg date  
328 (except when first egg date was the response variable), chick age at the time of the female's  
329 capture, and brood size. Analyses utilized 37 females for which we had all predictor variables.

330

### 331 **2.9.2 Does POT1 or relative telomere length better predict female responses to stress?**

332 We next tested the hypothesis that POT1 gene expression and relative telomere length  
333 predict a female's response to LPS injection, specifically her own change in body mass and  
334 visitation rate during sickness. For each trait, we ran a series of models that assumed a  
335 gaussian distribution and contained all combinations of POT1 gene expression, relative  
336 telomere length, treatment, first egg date, chick age, and brood size. Treatment was included in  
337 all candidate models. Analyses of mass change included the n=24 females for whom we have  
338 all predictor variables and recaptured within 24h of injections. Analyses of visitation rate  
339 included n=31 females for whom we have all predictor variables.

340

### 341 **2.9.3 How does maternal stress influence chick phenotypes?**

342



### 343 *Evaluating correlations among traits*

344 We evaluated correlations between phenotypic qualities in chicks (i.e., growth, change in  
345 relative telomere length, POT1 and PC1 for antioxidant gene expression, baseline and handling-  
346 induced CORT). We visualized relationships within each treatment using the corrplot package  
347 (Wei et al., 2017) and computed Spearman's  $r$  and  $p$ -values, adjusted for false discovery  
348 (Benjamini & Hochberg, 1995).

### 349 *Treatment effects on chick phenotypes*

351 We next tested how maternal LPS treatment affected chick phenotypes, including growth  
352 during the 24hr following maternal injection, telomere attrition from pre-treatment to 12-days old,  
353 POT1 gene expression, PC1 for antioxidant gene expression, baseline CORT, and handling-  
354 induced CORT. Because traits were largely uncorrelated (**Fig S4**), we analyzed each trait  
355 separately. Two outliers were detected in the chick growth dataset (Grubb's test,  $p < 0.05$ ) and  
356 were removed. To meet model assumptions, baseline and handling-induced CORT were log-  
357 transformed. For each trait, we ran a series of linear mixed-effects models using the nlme  
358 package (Pinheiro et al., 2019) that assumed a gaussian distribution and included main effects  
359 of treatment, sex, treatment x sex interaction, brood size, hatch date, and a random effect of  
360 nest. For CORT models, we also included a fixed effect of time of day, and for change in relative  
361 telomere length models, we included qPCR plate as a fixed effect. Because our primary  
362 question asks how treatment influences these traits, treatment was included in all candidate  
363 models, and model comparisons allowed us to assess which covariates to include in final  
364 analyses. We report Satterthwaite-adjusted degrees of freedom. Due to logistical considerations  
365 described above, final sample sizes per global model varied by response variable:  $n=159$  chick  
366 growth;  $n=147$  change in relative telomere length;  $n=77$  POT1 gene expression;  $n=77$  PC1 for  
367 antioxidant gene expression;  $n=107$  baseline CORT;  $n=107$  30-min CORT.

### 368 **2.9.4 How do chick phenotypes relate to survival?**

369 To test how chick phenotypes relate to survival to fledging or recruitment the following  
370 year, we ran a series of generalized linear mixed models which assumed a binomial distribution  
371 and included treatment, sex, change in relative telomere length, POT1 and PC1 for antioxidant  
372 gene expression, 12-day old body mass, baseline CORT, and handling-induced CORT, with  
373 nest box as a random effect. As above, CORT data were log-transformed. The analysis on  
374 survival to fledging included 76 chicks from 26 broods for which we had all physiological metrics  
375 taken at 12-days old. Of these 76 chicks, only 11 failed to fledge. The analysis on recruitment  
376 included 65 fledged chicks from 26 broods for which we had all physiological metrics. Of these  
377 65 chicks, only 5 recruited into the breeding population the following year, typical of the 5-10%  
378 return rate in this species (Winkler et al., 2020). PC1 for antioxidant gene expression was  
379 removed from the global model for recruitment to avoid multicollinearity with POT1 (variable  
380 inflation = 9.21).

## 381 **3. RESULTS**

### 382 **3.1 POT1 gene expression and female quality**

384 POT1 gene expression largely outperformed relative telomere length as a predictor of  
385 variation in female quality. Top-ranked models for first egg date and body mass both contained  
386 POT1 gene expression but not relative telomere length (**Table 1A**), and POT1 gene expression  
387 had higher variable importance than relative telomere length when summed across all candidate  
388 models (**Fig 2, Fig S2**). The best supported model predicting first egg date contained POT1  
389 gene expression: earlier breeding females exhibited lower POT1 gene expression ( $F_{1,35}=4.80$ ,  
390  $p=0.035$ ; **Table 1A; Fig 1A**). The top model for body mass indicated significant main effects of  
391 POT1 gene expression and chick age, where body mass was heavier in females with lower  
392 POT1 gene expression ( $F_{1,34}=5.25$ ,  $p=0.028$ ) and those with younger chicks ( $F_{1,34}=4.65$ ,

395 p=0.038; **Table 1A; Fig 1B**). The top-ranked model predicting wing length included first egg  
396 date, but the null model was most parsimonious (**Table 1A; Fig 1C**).

397

### 398 **3.2 POT1 gene expression and female responses to stress**

399 Female POT1 gene expression was unaffected by treatment ( $F_{1,24}=0.086$ ,  $p=0.77$ ), and  
400 pre-injection and post-injection mRNA abundances were positively correlated ( $\rho=0.76$ ,  
401  $p<0.0001$ ), suggesting consistency in POT1 gene expression in our adult study subjects.

402 For models predicting treatment-induced changes in visitation rate, POT1 gene  
403 expression had more overall support than relative telomere length (**Fig 2, Fig 3B, Fig S3B**). The  
404 top-ranked model predicting changes to visitation rate indicated a treatment x POT1 interaction  
405 showing that among LPS-injected females, those with the lowest POT1 gene expression best  
406 maintained high visitation rates (**Fig 3B**). However, the most parsimonious model included only  
407 treatment and POT gene expression: LPS-injected females significantly decreased visitation  
408 rates during the peak of sickness (saline =  $-0.67 \pm 0.59$  visits/hour; LPS =  $-3.74 \pm 1.08$   
409 visits/hour;  $F_{1,28}=7.44$ ,  $p=0.011$ , **Table 1B, Fig 3B**), and females with the lowest POT1 gene  
410 expression exhibited marginally higher visitation rates ( $F_{1,28}=3.89$ ,  $p=0.059$ ).

411 For models predicting a female's treatment-induced change in body mass, relative  
412 telomere length had more overall support (higher variable importance) than POT1 gene  
413 expression. While the top-ranked model contained treatment and relative telomere length,  
414 telomere length was not a significant predictor of mass change ( $F_{1,21}=2.81$ ,  $p=0.11$ ), and the  
415 most parsimonious model included treatment alone (**Table 1B; Fig 3A, Fig S3A**). There was no  
416 significant treatment effect on body mass ( $F_{1,22}=1.16$ ,  $p=0.29$ ), though LPS-treated females  
417 varied from a loss of 9.9% to a gain of 3.5% body mass (**Fig 3A**).

418

### 419 **3.3 Effects of maternal injection on chick phenotypes**

420

#### 421 *Relationships among phenotypes*

422 Within saline and LPS chicks, we only found one significant association between  
423 telomere-related mechanisms: there was a positive correlation between POT1 gene expression  
424 and PC1 for antioxidant gene expression (**Fig S4A, Fig S4B**).

425

#### 426 *Differences in chick phenotypes in response to maternal injections*

427 While the top-ranked model predicting chick growth included main effects of treatment,  
428 sex (and their interaction), and brood size, the most parsimonious model predicting chick growth  
429 contained only treatment, sex, and brood size (**Table S2**). Chicks of LPS-females grew  
430 significantly less in the 24h following maternal injection ( $F_{1,32}=11.98$ ,  $p=0.0015$ , **Fig 4A, Table**  
431 **S2**), with no main effects of sex ( $F_{1,122}=0.99$ ,  $p=0.32$ ) or brood size ( $F_{1,33}=2.02$ ,  $p=0.16$ ).

432 The top-ranked model predicting change in relative telomere length contained treatment  
433 and qPCR plate (**Fig 4B, Table S2**), where chicks of LPS-injected females exhibited  
434 significantly less telomere shortening relative to controls ( $F_{1,32}=4.19$ ,  $p=0.049$ , plate effect:  
435  $F_{1,32}=0.36$ ,  $p=0.55$ ), which cannot be explained by measurement error alone (see **SI material**).

436 The top-ranked and most parsimonious model predicting POT1 gene expression  
437 included treatment and sex: POT1 gene expression was significantly lower in chicks of LPS-  
438 injected females ( $F_{1,24}=6.06$ ,  $p=0.02$ , **Fig 4C, Table S2**) and in female chicks ( $F_{1,50}=6.52$ ,  
439  $p=0.014$ ).

440 The top-ranked model predicting PC1 for antioxidant gene expression indicated  
441 significantly lower POT1 gene expression in female chicks regardless of treatment, but the most  
442 parsimonious model included treatment as the only main effect: chicks of saline and LPS-  
443 injected females did not significantly differ in antioxidant gene expression ( $F_{1,24}=2.13$ ,  $p=0.16$ ,  
444 **Fig 4D, Table S2**).

445 Although the top-ranked model predicting baseline CORT included treatment and time of  
446 day, the most parsimonious model showed that baseline CORT did not significantly differ by

447 treatment ( $F_{1,32}=0.39$ ,  $p=0.54$ , **Fig 4E**, **Table S2**). The top-ranked model predicting handling-  
448 induced CORT showed no significant effects of treatment ( $F_{31}=2.53$ ,  $p=0.12$ , **Fig 4F**, **Table S2**)  
449 or time of day ( $F_{1,31}=2.14$ ,  $p=0.15$ ).

450

### 451 **3.4 Model comparisons linking chick phenotypes to survival**

452 The highest-ranking and most parsimonious model predicting chick survival to fledging  
453 included mass and handling-induced CORT at 12-days old (**Table 2**). Compared to chicks that  
454 did not survive, fledged chicks had a heavier body mass ( $z=2.81$ ,  $p=0.005$ ) and marginally  
455 higher handling-induced CORT secretion ( $z=1.88$ ,  $p=0.059$ ). These same traits had high  
456 importance across all candidate models predicting fledging success, while variable importance  
457 of change in relative telomere length and POT1 gene expression were low (**Fig 2**).

458 Recruitment models pointed to a different set of traits. The top-ranked model for  
459 recruitment into the breeding population included main effects of both change in relative  
460 telomere length and POT1 gene expression, but the most parsimonious model included only  
461 change in relative telomere length: regardless of treatment, chicks experiencing less telomere  
462 shortening were more likely to recruit into the breeding population the following year ( $z=2.18$ ,  
463  $p=0.030$ ; **Table 2**). Across all candidate models predicting recruitment, change in relative  
464 telomere length and POT1 gene expression had the highest importance, 0.83 and 0.61,  
465 respectively (**Fig 2**).

466

## 467 **4. DISCUSSION**

468 In the field of ecology and evolution, long telomeres have become nearly synonymous  
469 with a variety of fitness-related traits, yet very little work considers the role of telomere  
470 regulatory mechanisms in adaptive phenotypic plasticity in nature. To our knowledge, this is the  
471 first study to assess how natural variation in gene expression of a shelterin protein predicts  
472 performance in a free-living system. Lower levels of POT1 gene expression should facilitate  
473 telomeric repair, and we show low mRNA abundance is related to metrics of high quality in adult  
474 females. Experimental evidence echoes this view: females with naturally lower POT1 gene  
475 expression were most able to maintain parental care during an ecologically relevant stressor  
476 that otherwise decreased provisioning and temporarily slowed chick growth. Interestingly, chicks  
477 of LPS-injected mothers decreased POT1 gene expression and exhibited telomere elongation in  
478 the following week, consistent with the idea that low POT1 permits telomere buffering from  
479 stress. We also find some support that these effects are visible to natural selection: changes in  
480 telomere length and POT1 gene expression were the strongest predictors of chick recruitment  
481 the following year. Together, our results suggest that telomere regulators are stress-responsive  
482 and predict performance, oftentimes more so than telomere length itself. As we discuss below,  
483 telomere regulatory genes like POT1 are potentially key modulators of variation in life history  
484 strategies.

485

### 486 *POT1 gene expression predicts performance in breeding females*

487

488 Raising young is a predictably challenging life history stage, and we show that adult  
489 females with lower POT1 gene expression exhibited higher quality traits, including an earlier  
490 start to breeding and a heavier body mass during the chick period, both of which are condition-  
491 dependent traits associated with higher reproductive performance in tree swallows (Winkler et  
492 al., 2020). Our experimental manipulation also suggests that POT1 predicts a female's handling  
493 of stress: LPS-injected females decreased in provisioning rates, but this effect was weakest for  
494 constitutively low-POT1 females, who exhibited visitation rates comparable to those of saline-  
495 injected controls. Critically, POT1 gene expression showed higher variable importance than  
496 relative telomere length in predicting most of these performance-related traits, and variables  
497 better predicted by telomeres – wing length and female mass change – were not significantly  
498 related to relative telomere length (see **Fig S2C**, **S3A**). These results contribute to a growing

499 body of literature linking telomeres with timing of breeding (Bauch et al., 2013; Bauer et al.,  
500 2018; Le Vaillant et al., 2015) and body mass (Angelier et al., 2015; Angelier et al., 2019). Our  
501 findings therefore extend this work with new perspectives in which telomere *regulation* may  
502 track fitness-related traits.

503

#### 504 *POT1 gene expression predicts responses to acute stress in chicks*

505

506 While stress-responsive elements, such as glucocorticoids or antioxidants, may affect  
507 telomerase *expression* (Beery et al., 2012; Choi et al., 2008; Zietzer et al., 2017), POT1 should  
508 alter telomerase *efficacy* because of competitive binding between telomerase and POT1 at the  
509 3' telomere end. Consequently, decreased POT1 gene expression in chicks of LPS-treated  
510 females may increase telomerase access to the telomere and buffer telomeres from loss. This  
511 idea is consistent with the relative telomere elongation seen in stress-exposed chicks, but  
512 whether POT1 covaries quantitatively with telomerase activity requires further study,  
513 considering that we did not observe a linear relationship between POT1 mRNA abundance and  
514 telomere dynamics (**Fig S4**). Biomedical work shows POT1 gene expression to be plastic  
515 following stress in rodents and stem cells (Ludlow et al., 2017; Ludlow et al., 2012; Moazzam et  
516 al., 2020), but we are not aware of comparable results in a wild animal. Interestingly, POT1  
517 gene expression did not respond to the LPS-induced stressor in adult females, suggesting that  
518 plasticity in POT1 is context-dependent or only occurs when telomerase activity is also high,  
519 such as the early postnatal period (Hausmann et al., 2007). How we interpret these dynamics  
520 in blood calls for a closer look at blood-producing tissues in future work, particularly since some  
521 tissues may be more prone to telomere repair than others (Wolf et al., in press). Regardless, our  
522 results identify POT1 as an ecologically important gene that may mediate performance in the  
523 wild.

524

525 Recent work in wild populations shows that telomere elongation can occur amidst a  
526 generalized trend of telomere shortening, although it may be limited to specific life-history  
527 stages (Fairlie et al., 2016; Hatakeyama et al., 2016; Hoelzl et al., 2016; Spurgin et al., 2018;  
528 van Lieshout et al., 2019). Here, we document evidence of short-term telomere elongation in  
529 response to acute stress, particularly in chicks of LPS-injected mothers. Our analyses suggest  
530 that this elongation is not explained by measurement error (see SI materials, Bateson & Nettle,  
531 2017; Steenstrup et al., 2013). However, alternative mechanisms can manifest as pseudo-  
532 lengthening (Epel, 2012), including turnover of existing cells by longer-telomere counterparts or  
533 changes in cell composition with age (Beaulieu et al., 2017; Montes et al., 2003; but see Watson  
534 et al., 2017). In birds, whole blood is dominated by nucleated red blood cells that turn over every  
535 ~9 days (Muriel et al., 2020), and telomere attrition has occurred within a similar timeframe in  
536 other species (Nettle et al., 2015; Stier et al., 2016), suggesting that production of longer  
537 telomere blood cells is plausible and may co-occur with lower levels of POT1 mRNA. Changes  
538 in interstitial telomeres may also appear as elongation, although repeated measures designs  
539 like ours minimize these effects (Foote et al., 2013). Moving forward, exploring environmental  
540 cues, underlying mechanisms, and long-term consequences of apparent telomere elongation  
541 will inform our understanding of telomeres as causal drivers of evolutionarily relevant  
542 phenotypes.

543

544 Notably, POT1 gene expression varied with our molecular measure of antioxidant  
545 capacity. In particular, POT1 and antioxidant gene expression showed a strong positive  
546 correlation among chicks, suggesting that individuals may invest in *either* prevention of telomere  
547 loss (i.e. high antioxidants but lower telomerase accessibility via high POT1) or recuperation of  
548 telomere loss (i.e. higher telomerase accessibility but low antioxidants). Interestingly, male and  
549 female chicks may implement different strategies, as 12-day old females exhibited significantly  
550 lower POT1 gene expression than males, and some models  $\leq 2$  AIC<sub>c</sub> indicated lower antioxidant

551 gene expression in females as well. POT1 gene expression and change in relative telomere  
552 length were the only traits showing significant treatment effects in 12-day old chicks, despite  
553 some trends observed for handling-induced CORT and antioxidant gene expression (see **Fig 4**).  
554 One interpretation is that these effects are already returning to baseline levels by the time we  
555 sampled chicks one week after stress exposure, much like the faded effects of other stressors  
556 over time (Deviche et al., 2016; Li et al., 2017). Alternatively, naturalistic stressors like this  
557 single day of reduced provisioning may have mild effects on the organism, albeit effects that can  
558 culminate in relevant performance consequences (elaborated below). Regardless of these  
559 possibilities, our results focus attention on telomere-regulatory mechanisms as potentially vital  
560 players in phenotypic responses to early life stress.

561

### 562 *Implications for the evolution of life history strategies*

563

564 Several components of the chick phenotype also predicted survival to key life history  
565 milestones. Telomere dynamics, namely the change in relative telomere length in the week  
566 following a stressor and POT1 gene expression, held little importance in predicting immediate  
567 survival to fledging; instead, fledging success was higher for heavier chicks and marginally  
568 higher for chicks with strong CORT elevation, consistent with past work (McCarty, 2001;  
569 Schoenle et al., 2020). On the other hand, change in relative telomere length and POT1 gene  
570 expression showed the highest variable importance in predicting recruitment to the breeding  
571 population the following year. In particular, chicks with the most positive change in relative  
572 telomere length were more likely to return as adults, suggesting that minimized telomere attrition  
573 predicts survival (as in Boonekamp et al., 2014; Wood & Young, 2019). This result stands in  
574 contrast to most other model comparisons in our study, which showed a higher importance of  
575 POT1 gene expression than relative telomere length in predicting fitness-related traits. Notably,  
576 though, our sample size of return chicks was quite low, given the intrinsically high juvenile  
577 mortality in this system. Considering that the mildest telomere attrition occurred in parallel with  
578 downregulation of POT1 gene expression, our results collectively lend strength to the view that  
579 underlying telomere regulation may contribute to survival prospects.

580

581 Are telomere regulators the driving force connecting telomere dynamics and  
582 performance in nature? Telomere regulatory mechanisms do have pleiotropic effects, meaning  
583 they may effectively link telomere attrition with downstream performance (Wood & Young,  
584 2019). Indeed, telomerase has dual roles in telomere repair and other vital telomere-  
585 independent functions (Ahmed et al., 2008; de Jesus et al., 2011, 2012), yet whether  
586 telomerase regulators can equally modulate *both* telomere length and somatic integrity is  
587 unclear. As the sole shelterin protein able to bind single-stranded DNA (de Lange, 2018), POT1  
588 is the most direct bridge to telomerase and its downstream effects on telomere length. POT1  
589 also may repress DNA damage (Renfrew et al., 2014; Wu et al., 2020), providing a mechanism  
590 for pleiotropic effects that causally link this telomere regulator with more generalized somatic  
591 integrity. Under this scenario, telomere length may be a passive scribe accompanying changes  
592 in health and longevity (see Bateson & Nettle, 2018), both of which may be driven by  
593 ecologically relevant variation in telomere regulators, much like we observed in this study.

594

### 595 *Conclusions*

596 Our results linking POT1 with performance in both adults and chicks suggest that  
597 variation in telomere regulators may be visible to natural selection. As molecular biology has  
598 infused all areas of ecology, evolution, and behavior, we have repeatedly seen an increasing  
599 emphasis on the *regulation* of particular traits, including carotenoids and the maintenance of  
600 honesty (Koch et al., 2017; Mundy et al., 2016) or testosterone and the evolution of sexual  
601 phenotypes (Fuxjager & Schuppe, 2018; Lipshutz et al., 2019). Our findings advocate for similar  
602 changes at the intersection of evolutionary ecology and telomere biology. Clearly, a singular

603 focus on telomere length is incomplete (sensu Casagrande & Hau, 2019; Casagrande et al.,  
604 2020; Wood & Young, 2019), and a renewed focus on the mechanisms that shift the balance  
605 between attrition and repair is a promising avenue for advances to our understanding of life  
606 history.

607  
608 **ACKNOWLEDGEMENTS:** We are grateful to EK Dossey, SD Myers, EM George, DJ Bolinger,  
609 BS Duggan, KR Stansberry, and KR Content for support in the field and lab; to the Center for  
610 the Integrative Study of Animal Behavior (CISAB) for support; and to our reviewers for feedback.  
611 This research was supported by NSF (IOS-1656109; DBI-1460949), the National Institutes of  
612 Health (T32HD049336), and the Indiana University Research and Teaching Preserve.

## 613 614 REFERENCES

- 615 Ahmed, S., Passos, J. F., Birket, M. J., Beckmann, T., Brings, S., Peters, H., . . . Saretzki, G. (2008). Telomerase  
616 does not counteract telomere shortening but protects mitochondrial function under oxidative stress. *Journal*  
617 *of cell science*, *121*(7), 1046-1053.
- 618 Alatalo, R. V., Lundberg, A., & Glynn, C. (1986). Female pied flycatchers choose territory quality and not male  
619 characteristics. *Nature*, *323*(6084), 152.
- 620 Allsopp, R. C., Chang, E., Kashefi-Aazam, M., Rogaev, E. I., Piatyszek, M. A., Shay, J. W., & Harley, C. B. (1995).  
621 Telomere shortening is associated with cell division in vitro and in vivo. *Experimental cell research*,  
622 *220*(1), 194-200.
- 623 Angelier, F., Costantini, D., Blevin, P., & Chastel, O. (2018). Do glucocorticoids mediate the link between  
624 environmental conditions and telomere dynamics in wild vertebrates? A review. *General and comparative*  
625 *endocrinology*, *256*, 99-111.
- 626 Angelier, F., Vleck, C. M., Holberton, R. L., & Marra, P. P. (2015). Bill size correlates with telomere length in male  
627 American Redstarts. *Journal of Ornithology*, *156*(2), 525-531.
- 628 Angelier, F., Weimerskirch, H., Barbraud, C., & Chastel, O. (2019). Is telomere length a molecular marker of  
629 individual quality? Insights from a long-lived bird. *Functional Ecology*, *33*(6), 1076-1087.
- 630 Badas, E. P., Martinez, J., Rivero de Aguilar Cachafeiro, J., Miranda, F., Figuerola, J., & Merino, S. (2015). Ageing  
631 and reproduction: antioxidant supplementation alleviates telomere loss in wild birds. *J Evol Biol*, *28*(4),  
632 896-905. doi:10.1111/jeb.12615
- 633 Barton, K. (2019). MuMIn: Multi-Model Inference. Retrieved from <https://CRAN.R-project.org/package=MuMIn>
- 634 Bateson, M., & Nettle, D. (2017). The telomere lengthening conundrum—it could be biology. *Aging Cell*, *16*(2), 312-  
635 319.
- 636 Bauch, C., Becker, P. H., & Verhulst, S. (2013). Telomere length reflects phenotypic quality and costs of  
637 reproduction in a long-lived seabird. *Proc Biol Sci*, *280*(1752), 20122540. doi:10.1098/rspb.2012.2540
- 638 Bauer, C. M., Graham, J. L., Abolins-Abols, M., Heidinger, B. J., Ketterson, E. D., & Greives, T. J. (2018).  
639 Chronological and biological age predict seasonal reproductive timing: an investigation of clutch initiation  
640 and telomeres in birds of known age. *The American Naturalist*, *191*(6), 777-782.
- 641 Beaulieu, M., Benoit, L., Abaga, S., Kappeler, P. M., & Charpentier, M. J. (2017). Mind the cell: seasonal variation  
642 in telomere length mirrors changes in leucocyte profile. *Molecular Ecology*, *26*(20), 5603-5613.
- 643 Beaulieu, M., Reichert, S., Le Maho, Y., Ancel, A., & Criscuolo, F. (2011). Oxidative status and telomere length in  
644 a long-lived bird facing a costly reproductive event. *Functional Ecology*, *25*(3), 577-585.  
645 doi:10.1111/j.1365-2435.2010.01825.x
- 646 Beery, A. K., Lin, J., Biddle, J. S., Francis, D. D., Blackburn, E. H., & Epel, E. S. (2012). Chronic stress elevates  
647 telomerase activity in rats. *Biol Lett*, *8*(6), 1063-1066. doi:10.1098/rsbl.2012.0747
- 648 Benjamini, Y., & Hochberg, Y. (1995). Controlling the false discovery rate: a practical and powerful approach to  
649 multiple testing. *Journal of the Royal statistical society: series B (Methodological)*, *57*(1), 289-300.
- 650 Bentz, A. B., Rusch, D. B., Buechlein, A., & Rosvall, K. A. (2019). The neurogenomic transition from territory  
651 establishment to parenting in a territorial female songbird. *BMC genomics*, *20*(1), 1-10.
- 652 Blackburn, E. H. (2000). Telomere states and cell fates. *Nature*, *408*(6808), 53-56.
- 653 Blackburn, E. H., Greider, C. W., Henderson, E., Lee, M. S., Shampay, J., & Shippen-Lentz, D. (1989). Recognition  
654 and elongation of telomeres by telomerase. *Genome*, *31*(2), 553-560.
- 655 Bonter, D. N., & Bridge, E. S. (2011). Applications of radio frequency identification (RFID) in ornithological  
656 research: a review. *Journal of Field Ornithology*, *82*(1), 1-10.
- 657 Boonekamp, J. J., Bauch, C., Mulder, E., & Verhulst, S. (2017). Does oxidative stress shorten telomeres? *Biology*  
658 *Letters*, *13*(5), 20170164.

- 659 Boonekamp, J. J., Mulder, G. A., Salomons, H. M., Dijkstra, C., & Verhulst, S. (2014). Nestling telomere  
660 shortening, but not telomere length, reflects developmental stress and predicts survival in wild birds.  
661 *Proceedings of the Royal Society B: Biological Sciences*, 281(1785), 20133287.  
662 doi:10.1098/rspb.2013.3287
- 663 Breuner, C. W., & Berk, S. A. (2019). Using the van Noordwijk and de Jong resource framework to evaluate  
664 glucocorticoid-fitness hypotheses. *Integrative and Comparative Biology*, 59(2), 243-250.
- 665 Burnham, K., & Anderson, D. (2002). *Model selection and multimodal inference: a practical information-theoretic*  
666 *approach* (2nd ed.). New York: Springer.
- 667 Burnham, K. P., Anderson, D. R., & Huyvaert, K. P. (2011). AIC model selection and multimodel inference in  
668 behavioral ecology: some background, observations, and comparisons. *Behavioral Ecology and*  
669 *Sociobiology*, 65(1), 23-35.
- 670 Çakmak, E., Akin Pekşen, Ç., & Bilgin, C. C. (2017). Comparison of three different primer sets for sexing birds.  
671 *Journal of Veterinary Diagnostic Investigation*, 29(1), 59-63.
- 672 Casagrande, S., Stier, A., Monaghan, P., Loveland, J. L., Boner, W., Lupi, S., . . . Hau, M. (2020). Increased  
673 glucocorticoid concentrations in early life cause mitochondrial inefficiency and short telomeres. *Journal of*  
674 *Experimental Biology*.
- 675 Cawthon, R. M. (2009). Telomere length measurement by a novel monochrome multiplex quantitative PCR method.  
676 *Nucleic acids research*, 37(3), e21-e21.
- 677 Chatelain, M., Drobniak, S. M., & Szulkin, M. (2020). The association between stressors and telomeres in  
678 non-human vertebrates: a meta-analysis. *Ecology letters*, 23(2), 381-398.
- 679 Choi, J., Fauce, S. R., & Effros, R. B. (2008). Reduced telomerase activity in human T lymphocytes exposed to  
680 cortisol. *Brain, behavior, and immunity*, 22(4), 600-605. doi:10.1016/j.bbi.2007.12.004
- 681 Costantini, D., Marasco, V., & Moller, A. P. (2011). A meta-analysis of glucocorticoids as modulators of oxidative  
682 stress in vertebrates. *J Comp Physiol B*, 181, 447-456. doi:10.1007/s00360-011-0566-2)
- 683 Criscuolo, F., Bize, P., Nasir, L., Metcalfe, N. B., Foote, C. G., Griffiths, K., . . . Monaghan, P. (2009). Real-time  
684 quantitative PCR assay for measurement of avian telomeres. *Journal of Avian Biology*, 40(3), 342-347.  
685 doi:10.1111/j.1600-048X.2008.04623.x
- 686 Criscuolo, F., Smith, S., Zahn, S., Heidinger, B., & Haussmann, M. (2018). Experimental manipulation of telomere  
687 length: does it reveal a corner-stone role for telomerase in the natural variability of individual fitness? *Phil.*  
688 *Trans. R. Soc. B*, 373(1741), 20160440.
- 689 Dakin, R., Lendvai, Á. Z., Ouyang, J., Moore, I., & Bonier, F. (2016). Plumage colour is associated with partner  
690 parental care in mutually ornamented tree swallows. *Animal Behaviour*, 111, 111-118.
- 691 de Jesus, B. B., Schneeberger, K., Vera, E., Tejera, A., Harley, C. B., & Blasco, M. A. (2011). The telomerase  
692 activator TA $\square$ 65 elongates short telomeres and increases health span of adult/old mice without increasing  
693 cancer incidence. *Aging Cell*, 10(4), 604-621.
- 694 de Jesus, B. B., Vera, E., Schneeberger, K., Tejera, A. M., Ayuso, E., Bosch, F., & Blasco, M. A. (2012).  
695 Telomerase gene therapy in adult and old mice delays aging and increases longevity without increasing  
696 cancer. *EMBO molecular medicine*, 4(8), 691-704.
- 697 De Lange, T. (2009). How telomeres solve the end-protection problem. *Science*, 326(5955), 948-952.
- 698 de Lange, T. (2018). Shelterin-mediated telomere protection. *Annual review of genetics*, 52, 223-247.
- 699 Deviche, P., Bittner, S., Davies, S., Valle, S., Gao, S., & Carpentier, E. (2016). Endocrine, metabolic, and behavioral  
700 effects of and recovery from acute stress in a free-ranging bird. *General and comparative endocrinology*,  
701 234, 95-102.
- 702 Eastwood, J. R., Hall, M. L., Teunissen, N., Kingma, S. A., Hidalgo Aranzamendi, N., Fan, M., . . . Peters, A.  
703 (2019). Early-life telomere length predicts lifespan and lifetime reproductive success in a wild bird.  
704 *Molecular Ecology*, 28(5), 1127-1137.
- 705 Epel, E. (2012). How “reversible” is telomeric aging? *Cancer Prevention Research*, 5(10), 1163-1168.
- 706 Epel, E. S., Lin, J., Dhabhar, F. S., Wolkowitz, O. M., Puterman, E., Karan, L., & Blackburn, E. H. (2010).  
707 Dynamics of telomerase activity in response to acute psychological stress. *Brain, behavior, and immunity*,  
708 24(4), 531-539.
- 709 Fairlie, J., Holland, R., Pilkington, J. G., Pemberton, J. M., Harrington, L., & Nussey, D. H. (2016). Lifelong  
710 leukocyte telomere dynamics and survival in a free-living mammal. *Aging Cell*, 15(1), 140-148.  
711 doi:10.1111/accel.12417
- 712 Foote, C. G., Vleck, D., & Vleck, C. M. (2013). Extent and variability of interstitial telomeric sequences and their  
713 effects on estimates of telomere length. *Molecular ecology resources*, 13(3), 417-428.
- 714 Fox, J., & Weisberg, S. (2011). An {R} Companion to Applied Regression. In: Sage.

- 715 Gaunt, A. S., Oring, L. W., Able, K., Anderson, D., Baptista, L., Barlow, J., & Wingfield, J. (1997). Guidelines to  
716 the use of wild birds in research. In: Washington, DC: The Ornithological Council.
- 717 Geiger, S., Le Vaillant, M., Lebard, T., Reichert, S., Stier, A., Y, L. E. M., & Criscuolo, F. (2012). Catching-up but  
718 telomere loss: half-opening the black box of growth and ageing trade-off in wild king penguin chicks. *Mol*  
719 *Ecol*, 21(6), 1500-1510. doi:10.1111/j.1365-294X.2011.05331.x
- 720 George, E. M., & Rosvall, K. A. (2018). Testosterone production and social environment vary with breeding stage in  
721 a competitive female songbird. *Hormones and behavior*, 103, 28-35.
- 722 Granger, M. P., Wright, W. E., & Shay, J. W. (2002). Telomerase in cancer and aging. *Critical reviews in*  
723 *oncology/hematology*, 41(1), 29-40.
- 724 Greider, C. W. (1998). Telomerase activity, cell proliferation, and cancer. *Proceedings of the National Academy of*  
725 *Sciences*, 95(1), 90-92.
- 726 Griebel, I. A., Fairhurst, G. D., Marchant, T. A., & Clark, R. G. (2019). Effects of parental and nest-site  
727 characteristics on nestling quality in the Tree Swallow (*Tachycineta bicolor*). *Canadian Journal of*  
728 *Zoology*, 97(1), 63-71.
- 729 Gu, P., Wang, Y., Bisht, K. K., Wu, L., Kukova, L., Smith, E. M., . . . Nandakumar, J. (2017). Pot1 OB-fold  
730 mutations unleash telomere instability to initiate tumorigenesis. *Oncogene*, 36(14), 1939-1951.
- 731 Hargitai, R., Török, J., Tóth, L., Hegyi, G., Rosivall, B., Szigeti, B., & Szöllösi, E. (2005). Effects of environmental  
732 conditions and parental quality on inter-and intraclutch egg-size variation in the Collared Flycatcher  
733 (*Ficedula albicollis*). *The Auk*, 122(2), 509-522.
- 734 Hatakeyama, H., Yamazaki, H., Nakamura, K.-I., Izumiyama-Shimomura, N., Aida, J., Suzuki, H., . . . Ishikawa, N.  
735 (2016). Telomere attrition and restoration in the normal teleost *Oryzias latipes* are linked to growth rate and  
736 telomerase activity at each life stage. *Aging (Albany NY)*, 8(1), 62.
- 737 Haussmann, M. F., Winkler, D. W., Huntington, C. E., Nisbet, I. C., & Vleck, C. M. (2007). Telomerase activity is  
738 maintained throughout the lifespan of long-lived birds. *Experimental Gerontology*, 42(7), 610-618.  
739 doi:10.1016/j.exger.2007.03.004
- 740 Haywood, S., & Perrins, C. M. (1992). Is clutch size in birds affected by environmental conditions during growth?  
741 *Proceedings of the Royal Society of London. Series B: Biological Sciences*, 249(1325), 195-197.
- 742 Hemann, M. T., Strong, M. A., Hao, L.-Y., & Greider, C. W. (2001). The shortest telomere, not average telomere  
743 length, is critical for cell viability and chromosome stability. *Cell*, 107(1), 67-77.
- 744 Hoelzl, F., Smith, S., Cornils, J. S., Aydinonat, D., Bieber, C., & Ruf, T. (2016). Telomeres are elongated in older  
745 individuals in a hibernating rodent, the edible dormouse (*Glis glis*). *Scientific reports*, 6, 36856.
- 746 Hussell, D. J. (1983). Age and plumage color in female tree swallows. *Journal of Field Ornithology*, 312-318.
- 747 Hwang, H., Buncher, N., Opreko, P. L., & Myong, S. (2012). POT1-TPP1 regulates telomeric overhang structural  
748 dynamics. *Structure*, 20(11), 1872-1880.
- 749 Kawanishi, S., & Oikawa, S. (2004). Mechanism of telomere shortening by oxidative stress. *Annals of the New York*  
750 *Academy of Sciences*, 1019(1), 278-284.
- 751 Kim, S.-Y., & Velando, A. (2015). Antioxidants safeguard telomeres in bold chicks. *Biology Letters*, 11(5),  
752 20150211.
- 753 Koch, R. E., Josefson, C. C., & Hill, G. E. (2017). Mitochondrial function, ornamentation, and immunocompetence.  
754 *Biological Reviews*, 92(3), 1459-1474.
- 755 Laprade, H., Querido, E., Smith, M. J., Guérit, D., Crimmins, H., Conomos, D., . . . Sfeir, A. (2020). Single-  
756 molecule imaging of telomerase RNA reveals a Recruitment-Retention model for telomere elongation.  
757 *Molecular Cell*.
- 758 Le Vaillant, M., Viblanc, V. A., Saraux, C., Le Bohec, C., Le Maho, Y., Kato, A., . . . Ropert-Coudert, Y. (2015).  
759 Telomere length reflects individual quality in free-living adult king penguins. *Polar Biology*, 38(12), 2059-  
760 2067.
- 761 Lendvai, A. Z., Akçay, Ç., Weiss, T., Haussmann, M. F., Moore, I. T., & Bonier, F. (2015). Low cost audiovisual  
762 playback and recording triggered by radio frequency identification using Raspberry Pi. *PeerJ*, 3, e877.
- 763 Lendvai, A. Z., Ouyang, J. Q., Schoenle, L. A., Fasanello, V., Haussmann, M. F., Bonier, F., & Moore, I. T. (2014).  
764 Experimental food restriction reveals individual differences in corticosterone reaction norms with no  
765 oxidative costs. *PLoS One*, 9(11), e110564.
- 766 Li, Y., Sun, Y., Krause, J. S., Li, M., Liu, X., Zhu, W., . . . Li, D. (2017). Dynamic interactions between  
767 corticosterone, corticosteroid binding globulin and testosterone in response to capture stress in male  
768 breeding Eurasian tree sparrows. *Comparative Biochemistry and Physiology Part A: Molecular &*  
769 *Integrative Physiology*, 205, 41-47.



- 770 Ludlow, A. T., Gratidao, L., Ludlow, L. W., Spangenburg, E. E., & Roth, S. M. (2017). Acute exercise activates p38  
771 MAPK and increases the expression of telomere-protective genes in cardiac muscle. *Experimental*  
772 *physiology*, 102(4), 397-410.
- 773 Ludlow, A. T., Lima, L. C., Wang, J., Hanson, E. D., Guth, L. M., Spangenburg, E. E., & Roth, S. M. (2012).  
774 Exercise alters mRNA expression of telomere-repeat binding factor 1 in skeletal muscle via p38 MAPK.  
775 *Journal of Applied Physiology*, 113(11), 1737-1746.
- 776 Magrath, R. D. (1991). Nestling weight and juvenile survival in the blackbird, *Turdus merula*. *The Journal of*  
777 *Animal Ecology*, 335-351.
- 778 Martin, T. E., & Geupel, G. R. (1993). Nest-Monitoring Plots: Methods for Locating Nests and Monitoring Success  
779 (Métodos para localizar nidos y monitorear el éxito de estos). *Journal of Field Ornithology*, 507-519.
- 780 McCarty, J. P. (2001). Variation in growth of nestling tree swallows across multiple temporal and spatial scales. *The*  
781 *Auk*, 118(1), 176-190.
- 782 McCarty, J. P. (2002). The number of visits to the nest by parents is an accurate measure of food delivered to  
783 nestlings in tree swallows. *Journal of Field Ornithology*, 73(1), 9-14.
- 784 Moazzam, M., Yim, T., Kumaresam, V. D., Henderson, D. C., Farrer, L. A., & Zhang, H. (2020). Analysis of  
785 telomere length variation and Shelterin complex subunit gene expression changes in ethanol-exposed  
786 human embryonic stem cells. *Journal of Psychiatric Research*.
- 787 Monaghan, P., & Ozanne, S. E. (2018). Somatic growth and telomere dynamics in vertebrates: relationships,  
788 mechanisms and consequences. *Philosophical Transactions of the Royal Society B: Biological Sciences*,  
789 373(1741). doi:10.1098/rstb.2016.0446
- 790 Montes, I., McLaren, G., Macdonald, D., & Mian, R. (2003). The effects of acute stress on leukocyte activation. *J.*  
791 *Physiol. P*, 548, 170.
- 792 Mundy, N. I., Stapley, J., Bennison, C., Tucker, R., Twyman, H., Kim, K.-W., . . . Slate, J. (2016). Red carotenoid  
793 coloration in the zebra finch is controlled by a cytochrome P450 gene cluster. *Current biology*, 26(11),  
794 1435-1440.
- 795 Muriel, J., Vida, C., Gil, D., & Pérez-Rodríguez, L. (2020). Ontogeny of leukocyte profiles in a wild altricial  
796 passerine. *Journal of Comparative Physiology B*, 1-12.
- 797 Nettle, D., Monaghan, P., Gillespie, R., Brilot, B., Bedford, T., & Bateson, M. (2015). An experimental  
798 demonstration that early-life competitive disadvantage accelerates telomere loss. *Proc Biol Sci*, 282(1798),  
799 20141610. doi:10.1098/rspb.2014.1610
- 800 Owen-Ashley, N. T., & Wingfield, J. C. (2006). Seasonal modulation of sickness behavior in free-living  
801 northwestern song sparrows (*Melospiza melodia morphna*). *Journal of Experimental Biology*, 209(16),  
802 3062-3070.
- 803 Palacios, M. G., Winkler, D. W., Klasing, K. C., Hasselquist, D., & Vleck, C. M. (2011). Consequences of immune  
804 system aging in nature: a study of immunosenescence costs in free-living Tree Swallows. *Ecology*, 92(4),  
805 952-966.
- 806 Pineda-Pampliega, J., Herrera-Dueñas, A., Mulder, E., Aguirre, J. I., Höfle, U., & Verhulst, S. (2020). Antioxidant  
807 supplementation slows telomere shortening in free-living white stork chicks. *Proceedings of the Royal*  
808 *Society B*, 287(1918), 20191917.
- 809 Pinheiro, J., Bates, D., DebRoy, S., & Sarkar, D. (2019). nlme: Linear and Nonlinear Mixed Effects Models.  
810 Retrieved from <https://CRAN.R-project.org/package=nlme>
- 811 Pisoschi, A. M., & Pop, A. (2015). The role of antioxidants in the chemistry of oxidative stress: A review. *European*  
812 *journal of medicinal chemistry*, 97, 55-74.
- 813 Reichert, S., & Stier, A. (2017). Does oxidative stress shorten telomeres in vivo? A review. *Biology Letters*, 13(12),  
814 20170463.
- 815 Renfrew, K. B., Song, X., Lee, J. R., Arora, A., & Shippen, D. E. (2014). POT1a and components of CST engage  
816 telomerase and regulate its activity in Arabidopsis. *PLoS Genet*, 10(10), e1004738.
- 817 Rosvall, K. A., Reichard, D. G., Ferguson, S. M., Whittaker, D. J., & Ketterson, E. D. (2012). Robust behavioral  
818 effects of song playback in the absence of testosterone or corticosterone release. *Hormones and behavior*,  
819 62(4), 418-425.
- 820 Schoenle, L. A., Zimmer, C., Miller, E. T., & Vitousek, M. N. (2020). Does variation in glucocorticoid  
821 concentrations predict fitness? A phylogenetic meta-analysis. *General and comparative endocrinology*,  
822 113611.
- 823 Schwagmeyer, P., & Mock, D. W. (2008). Parental provisioning and offspring fitness: size matters. *Animal*  
824 *Behaviour*, 75(1), 291-298.

- 825 Spurgin, L. G., Bebbington, K., Fairfield, E. A., Hammers, M., Komdeur, J., Burke, T., . . . Richardson, D. S.  
826 (2018). Spatio-temporal variation in lifelong telomere dynamics in a long-term ecological study. *Journal*  
827 *of Animal Ecology*, 87(1), 187-198.
- 828 Sridhar, M., Thammiah, V., & Suganthi, R. (2014). Detection of changes in genes related to antioxidant and  
829 biotransformation function in broiler birds fed aflatoxin by real time PCR. *The Indian Journal of Animal*  
830 *Sciences*, 84(2).
- 831 Steenstrup, T., Hjelmberg, J. v. B., Kark, J. D., Christensen, K., & Aviv, A. (2013). The telomere lengthening  
832 conundrum—artifact or biology? *Nucleic acids research*, 41(13), e131-e131.
- 833 Stier, A., Delestrade, A., Bize, P., Zahn, S., Criscuolo, F., & Massemin, S. (2016). Investigating how telomere  
834 dynamics, growth and life history covary along an elevation gradient in two passerine species. *Journal of*  
835 *Avian Biology*, 47(1), 134-140.
- 836 Stutchbury, B. J., & Robertson, R. J. (1986). A simple trap for catching birds in nest boxes. *Journal of Field*  
837 *Ornithology*, 57(1), 64-65.
- 838 Stutchbury, B. J., & Robertson, R. J. (1987). Two Methods of Sexing Adult Tree Swallows before They Begin  
839 Breeding (Dos Metodos para Determinar el Sexo en Golondrinas (Tachycineta bicolor)). *Journal of Field*  
840 *Ornithology*, 236-242.
- 841 Sudyka, J. (2019). Does Reproduction Shorten Telomeres? Towards Integrating Individual Quality with  
842 Life-History Strategies in Telomere Biology. *Bioessays*.
- 843 Tinbergen, J., & Boerlijst, M. (1990). Nestling weight and survival in individual great tits (Parus major). *The*  
844 *Journal of Animal Ecology*, 1113-1127.
- 845 Vagasi, C. I., Pătraș, L., Pap, P. L., Vincze, O., Mureșan, C., Nemeth, J., & Lendvai, A. Z. (2018). Experimental  
846 increase in baseline corticosterone level reduces oxidative damage and enhances innate immune response.  
847 *PLoS One*, 13(2), e0192701.
- 848 van Lieshout, S. H., Bretman, A., Newman, C., Buesching, C. D., Macdonald, D. W., & Dugdale, H. L. (2019).  
849 Individual variation in early-life telomere length and survival in a wild mammal. *Molecular Ecology*,  
850 28(18), 4152-4165.
- 851 Verhulst, S., Aviv, A., Benetos, A., Berenson, G. S., & Kark, J. D. (2013). Do leukocyte telomere length dynamics  
852 depend on baseline telomere length? An analysis that corrects for 'regression to the mean'. *European*  
853 *journal of epidemiology*, 28(11), 859-866.
- 854 Virgin, E. E., & Rosvall, K. A. (2018). Endocrine-immune signaling as a predictor of survival: A prospective study  
855 in developing songbird chicks. *General and comparative endocrinology*, 267, 193-201.
- 856 Vitousek, M. N., Taff, C. C., Ardia, D. R., Stedman, J. M., Zimmer, C., Salzman, T. C., & Winkler, D. W. (2018).  
857 The lingering impact of stress: brief acute glucocorticoid exposure has sustained, dose-dependent effects on  
858 reproduction. *Proceedings of the Royal Society B: Biological Sciences*, 285(1882), 20180722.
- 859 von Zglinicki, T. (2002). Oxidative stress shortens telomeres. *Trends in Biochemical Sciences*, 27(7), 339-344.
- 860 Wada, H., Hahn, T. P., & Breuner, C. W. (2007). Development of stress reactivity in white-crowned sparrow  
861 nestlings: total corticosterone response increases with age, while free corticosterone response remains low.  
862 *General and comparative endocrinology*, 150(3), 405-413.
- 863 Wang, F., Podell, E. R., Zaug, A. J., Yang, Y., Baciu, P., Cech, T. R., & Lei, M. (2007). The POT1-TPP1 telomere  
864 complex is a telomerase processivity factor. *Nature*, 445(7127), 506.
- 865 Watson, R. L., Bird, E. J., Underwood, S., Wilbourn, R. V., Fairlie, J., Watt, K., . . . McNeilly, T. N. (2017). Sex  
866 differences in leucocyte telomere length in a free-living mammal. *Molecular Ecology*, 26(12), 3230-3240.
- 867 Wei, T., Simko, V., Levy, M., Xie, Y., Jin, Y., & Zemla, J. (2017). Package 'corrplot'. *Statistician*, 56, 316-324.
- 868 Wilbourn, R. V., Moatt, J. P., Froy, H., Walling, C. A., Nussey, D. H., & Boonekamp, J. J. (2018). The relationship  
869 between telomere length and mortality risk in non-model vertebrate systems: a meta-analysis.  
870 *Philosophical Transactions of the Royal Society B: Biological Sciences*, 373(1741), 20160447.
- 871 Winkler, D. W., Hallinger, K. K., Pegan, T. M., Taff, C. C., Verhoeven, M. A., Chang Van Oordt, D., . . . Andersen,  
872 M. J. (2020). Full lifetime perspectives on the costs and benefits of lay date variation in tree swallows.  
873 *Ecology*.
- 874 Wood, E. M., & Young, A. J. (2019). Telomere attrition predicts reduced survival in a wild social bird, but short  
875 telomeres do not. *Molecular Ecology*.
- 876 Wu, Y., Poulos, R. C., & Reddel, R. R. (2020). Role of POT1 in Human Cancer. *Cancers*, 12(10), 2739.
- 877 Yarru, L. P., Settivari, R. S., Gowda, N. K. S., Antoniou, E., Ledoux, D. R., & Rottinghaus, G. E. (2009). Effects of  
878 turmeric (Curcuma longa) on the expression of hepatic genes associated with biotransformation,  
879 antioxidant, and immune systems in broiler chicks fed aflatoxin. *Poultry science*, 88(12), 2620-2627.  
880 doi:10.3382/ps.2009-00204

881 Zakian, V. A. (2012). Telomeres: the beginnings and ends of eukaryotic chromosomes. *Experimental cell research*,  
882 *318*(12), 1456-1460.  
883 Zietzer, A., Buschmann, E., Janke, D., Li, L., Brix, M., Meyborg, H., . . . Hillmeister, P. (2017). Acute physical  
884 exercise and long-term individual shear rate therapy increase telomerase activity in human peripheral  
885 blood mononuclear cells. *Acta Physiologica*, *220*(2), 251-262.  
886 Zinzow-Kramer, W. M., Horton, B. M., & Maney, D. L. (2014). Evaluation of reference genes for quantitative real-  
887 time PCR in the brain, pituitary, and gonads of songbirds. *Horm Behav*, *66*(2), 267-275.  
888 doi:10.1016/j.yhbeh.2014.04.011  
889  
890

891 **DATA ACCESIBILITY:** The data that support the findings of this study will be openly available  
892 on the Dryad Digital Repository.

893 **AUTHOR CONTRIBUTIONS:** SEW and KAR designed the study; SEW and TLS collected  
894 samples in the field; SEW coordinated RNA extractions and performed all DNA extractions,  
895 qPCR, and statistical analyses; and SEB molecularly sexed all chicks. SEW and KAR drafted  
896 the manuscript. All authors read, approved, and contributed to the final manuscript.

897 **TABLES AND FIGURES**  
898

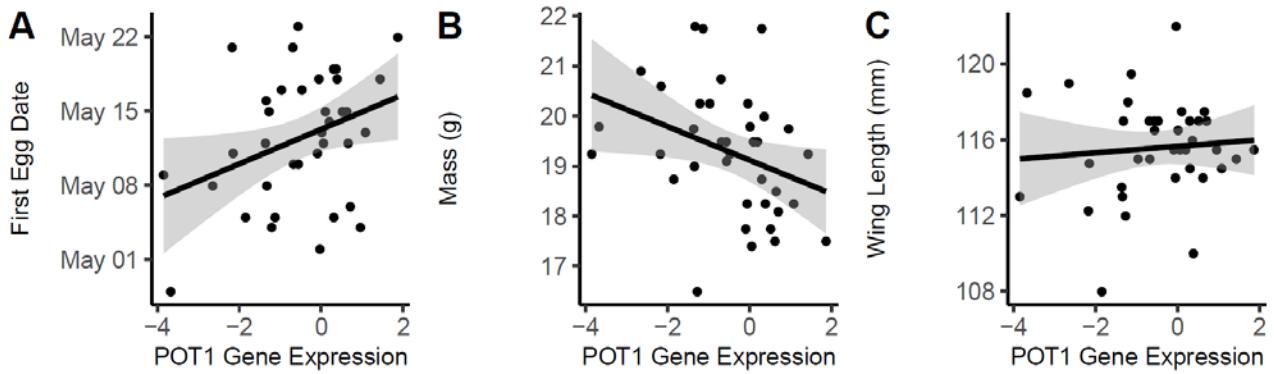

899 **Fig 1.** POT1 gene expression predicts metrics of female quality, including first egg date (A),  
900 body mass (B), but not wing length (C). Shading indicates 95% confidence interval from model  
901 output.  
902

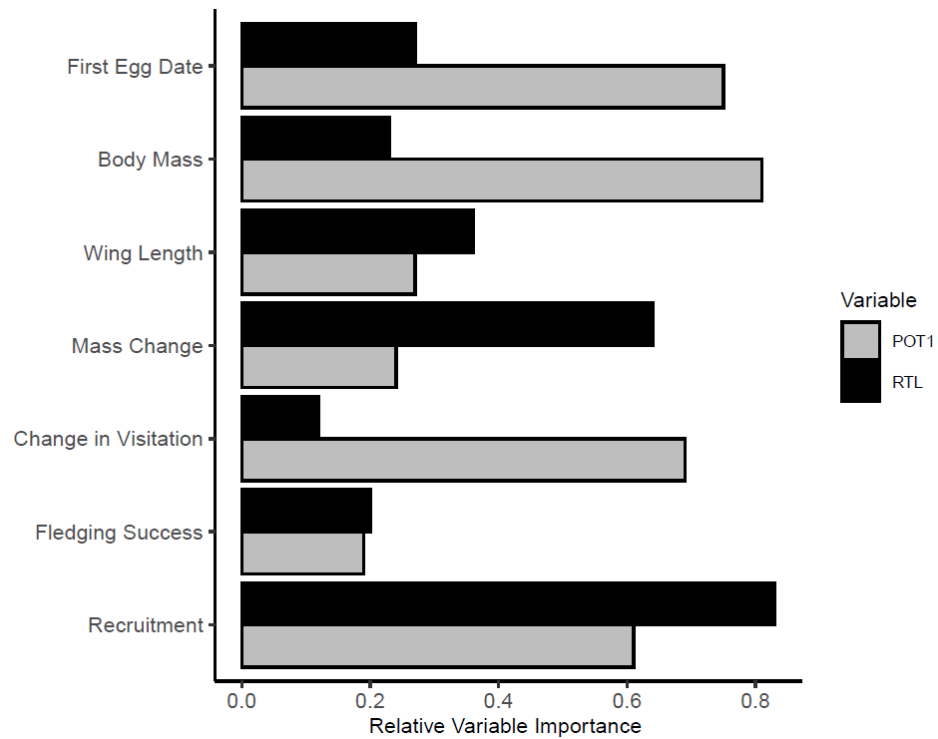

903 **Fig 2.** Comparing the importance of relative telomere length (RTL, black) and POT1 gene  
904 expression (gray) in predicting variation in fitness-related traits. Variable importance is the sum  
905 of Akaike weights across all models in which the variable occurred.  
906

**Table 1.** The top models ( $\Delta AIC_c \leq 2$ ) assessing the role of POT1 gene expression (POT1) and relative telomere length (RTL) in predicting (A) metrics of female quality and (B) maternal responses to injection. Global models are summarized in Section 2.9. K = # of parameters (including intercept),  $w_i$  = model weight, FED = first egg date.

| Variable                                   | Model                  | K | AICc   | $\Delta AIC_c$ | $w_i$ | $R_m^2$ |
|--------------------------------------------|------------------------|---|--------|----------------|-------|---------|
| <b>(A) Metrics of female quality</b>       |                        |   |        |                |       |         |
| <b>First Egg Date</b><br>(n=37)            | POT1                   | 2 | 239.98 | 0              | 0.252 | 0.118   |
|                                            | POT1 + Brood Size      | 3 | 241.4  | 1.42           | 0.124 | 0.14    |
|                                            | POT1 + Chick Age       | 3 | 241.51 | 1.53           | 0.117 | 0.137   |
|                                            | POT1 + RTL             | 3 | 241.58 | 1.6            | 0.113 | 0.135   |
| <b>Body Mass</b>                           | POT1 + Chick Age       | 3 | 121.25 | 0              | 0.281 | 0.216   |
|                                            | POT1 + Chick Age + FED | 4 | 123.06 | 1.81           | 0.114 | 0.228   |
|                                            | POT1 + Chick Age + RTL | 4 | 123.11 | 1.86           | 0.111 | 0.227   |
| <b>Wing Length</b>                         | FED                    | 2 | 178.79 | 0              | 0.135 | 0.074   |
|                                            | Intercept only (null)  | 1 | 179.33 | 0.54           | 0.103 | 0       |
|                                            | RTL                    | 3 | 179.6  | 0.81           | 0.09  | 0.112   |
|                                            | POT1 + FED             | 3 | 179.79 | 1              | 0.082 | 0.107   |
|                                            | RTL                    | 2 | 179.82 | 1.03           | 0.081 | 0.048   |
|                                            | Brood + FED            | 3 | 180.74 | 1.95           | 0.051 | 0.085   |
| <b>(B) Maternal responses to injection</b> |                        |   |        |                |       |         |
| $\Delta$ <b>Body Mass</b>                  | Treatment + RTL        | 3 | 136.25 | 0              | 0.176 | 0.15    |
|                                            | Treatment              | 2 | 136.36 | 0.11           | 0.167 | 0.048   |
|                                            | Treatment + FED        | 3 | 137.45 | 1.2            | 0.097 | 0.11    |
|                                            | Treatment + POT1 + RTL | 4 | 137.57 | 1.32           | 0.091 | 0.203   |
|                                            | Treatment + FED + RTL  | 4 | 137.77 | 1.52           | 0.082 | 0.197   |
| $\Delta$ <b>Visitation Rate</b>            | Treatment*POT1         | 4 | 163.2  | 0              | 0.365 | 0.36    |
|                                            | Treatment + POT1       | 3 | 164.85 | 1.65           | 0.16  | 0.274   |

907  
908

909

910

911

**Table 2.** The top models ( $\Delta AIC_c \leq 2$ ) assessing the role of POT1 gene expression and relative telomere length ( $\Delta RTL$ ) in predicting chick fledging and recruitment into the breeding population. The global model included treatment, sex,  $\Delta RTL$ , POT1 and PC1 antioxidant gene expression, 12-day old body mass (Mass), and log-transformed baseline CORT (T0 CORT) and handling-induced CORT (T30 CORT). All models include the intercept and random effect of nest. K = # of parameters (including intercept),  $w_i$  = model weight,  $R^2_m$  = variance explained by fixed effect,  $R^2_c$  = variance explained by fixed and random effects.

| Variable                       | Model                                | K | AICc  | $\Delta AIC_c$ | $w_i$ | $R^2_m$ | $R^2_c$ |
|--------------------------------|--------------------------------------|---|-------|----------------|-------|---------|---------|
| <b>Fledging Success (n=76)</b> | Mass + T30 CORT                      | 3 | 51.17 | 0              | 0.116 | 0.466   | 0.466   |
|                                | Mass + T30 CORT + Sex                | 4 | 51.45 | 0.28           | 0.1   | 0.515   | 0.635   |
|                                | Mass + T30 CORT + T0 CORT + Sex      | 5 | 52.62 | 1.45           | 0.056 | 0.522   | 0.522   |
|                                | Mass + T30 CORT + T0 CORT            | 4 | 53.04 | 1.87           | 0.045 | 0.469   | 0.469   |
|                                | $\Delta RTL$ + Mass + T30 CORT + Sex | 5 | 53.08 | 1.91           | 0.044 | 0.518   | 0.599   |
|                                | $\Delta RTL$ + Mass + T30 CORT       | 4 | 53.13 | 1.96           | 0.043 | 0.473   | 0.473   |
|                                | POT1 + Mass + T30 CORT               | 4 | 53.16 | 1.99           | 0.043 | 0.467   | 0.467   |
| <b>Recruitment (n=65)</b>      | $\Delta RTL$ + POT1                  | 3 | 34.51 | 0              | 0.172 | 0.475   | 0.541   |
|                                | $\Delta RTL$ + POT1 + Mass           | 4 | 36.11 | 1.6            | 0.077 | 0.516   | 0.516   |
|                                | $\Delta RTL$ + POT1 + Sex            | 4 | 36.11 | 1.6            | 0.077 | 0.544   | 0.544   |
|                                | $\Delta RTL$ + POT1 + Treatment      | 4 | 36.27 | 1.76           | 0.071 | 0.498   | 0.585   |
|                                | $\Delta RTL$                         | 2 | 36.34 | 1.83           | 0.069 | 0.292   | 0.292   |

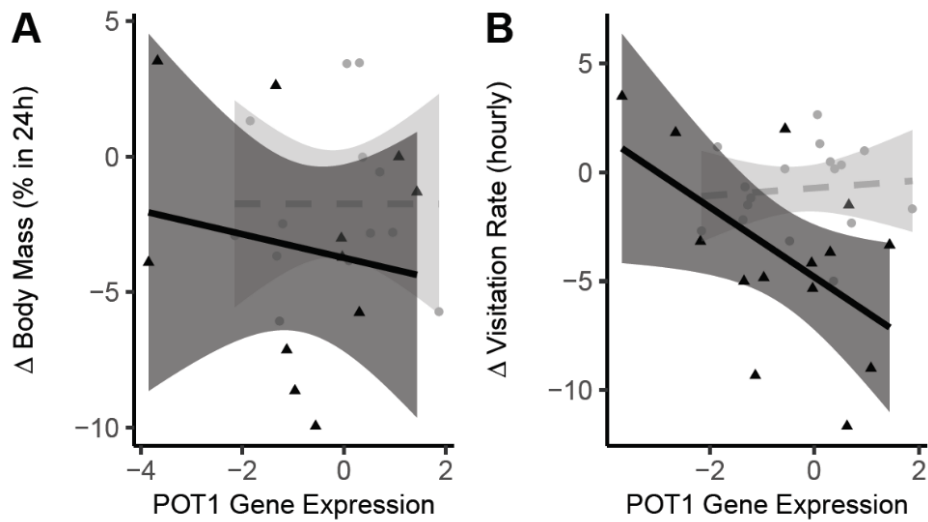

912 **Fig 3.** Female POT1 gene expression and responses to stress following injection of breeding  
913 mothers with saline (gray, circles, dashed line) or LPS (black, triangles, solid line): A) female  $\Delta$   
914 body mass within 24h of injection or B)  $\Delta$  visitation rate during the peak of sickness.

915  
916



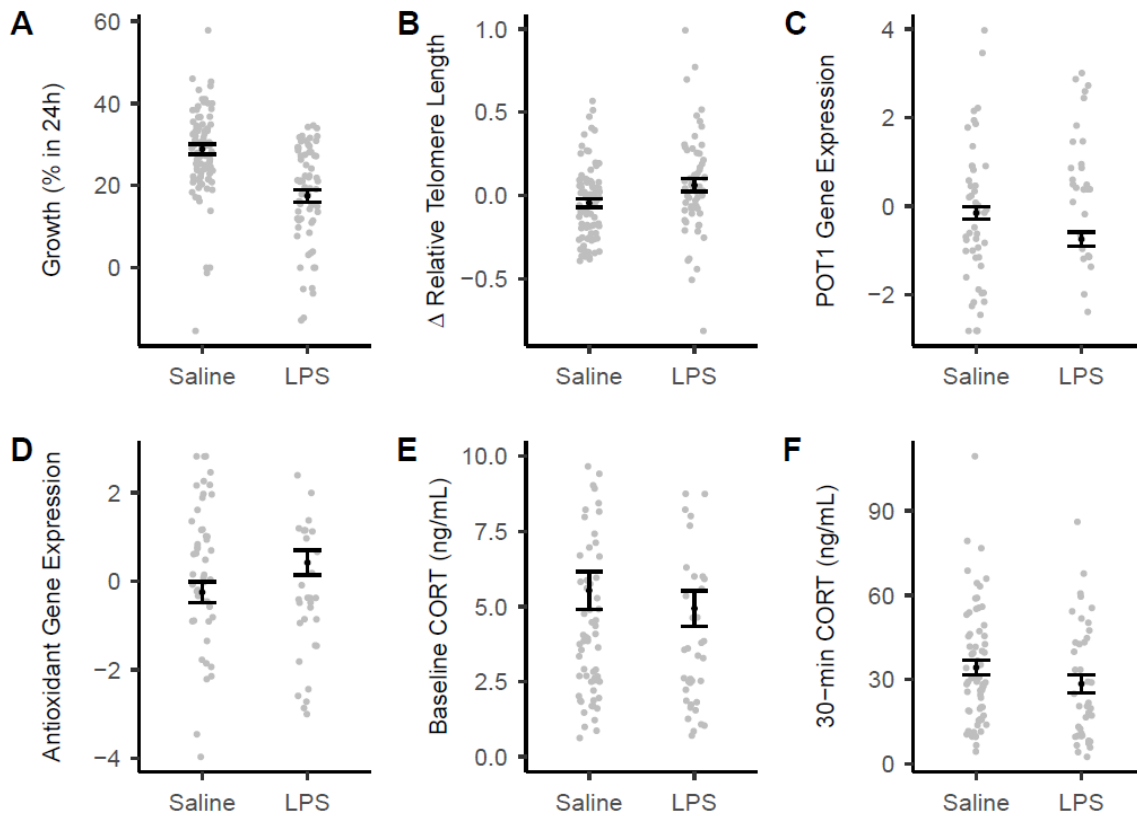

917 **Fig 4.** The effects of maternal treatment on chick phenotypes. A) Growth % during the 24h  
918 following maternal injection, B) change in relative telomere length, C) POT1 gene expression,  
919 D) antioxidant gene expression (i.e., PC1 for superoxide dismutase, glutathione peroxidase, and  
920 peroxiredoxin-1), E) baseline CORT, and F) handling-induced CORT. Gene expression data are  
921 on a log-2 scale. Global models included treatment, sex, treatment x sex interaction, hatch date,  
922 and brood size, with a random effect of nest; see **SI Table S2**. Errors bars are mean  $\pm$  SE.
